# Supplementary material for: A simple procedure for the covalent grafting of triphenylphosphine ligands on silica: application in the palladium catalyzed Suzuki reaction
Source: Royal Society of Chemistry journal article supplement (doi:10.1039/b820449g), 2009-01-01

# Supporting information

## Table of Contents:

- EDX spectra of fresh catalyst **4** (a)
- SEM image and EDX spectra of catalyst **4** after 4 run recovery (b)
- Infrared spectra of **2** (c)
- Infrared spectra of **3** (d)
- Infrared spectra of neat silica and **4** (e)
- Copies of  $^1\text{H}$  and  $^{31}\text{P}$  NMR spectra of **2** (f)
- Copies of  $^1\text{H}$ ,  $^{31}\text{P}$  and  $^{13}\text{C}$  NMR spectra of **3** (g)

(a)

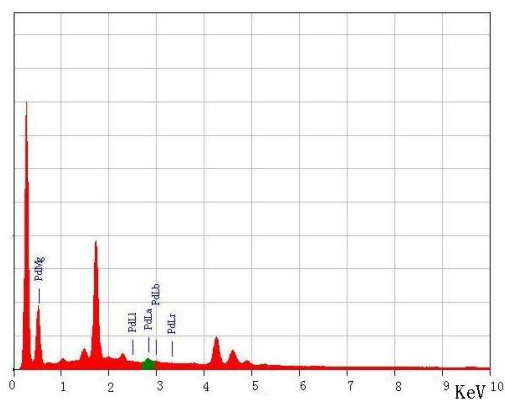

(b)

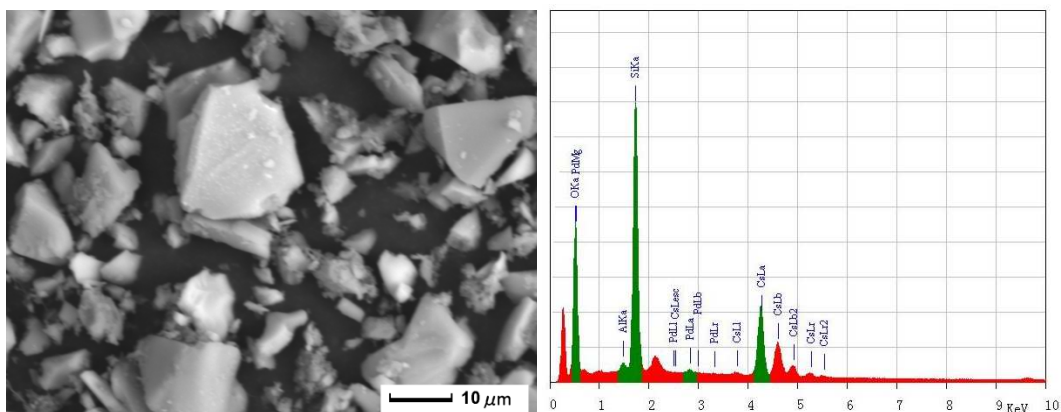

(c)

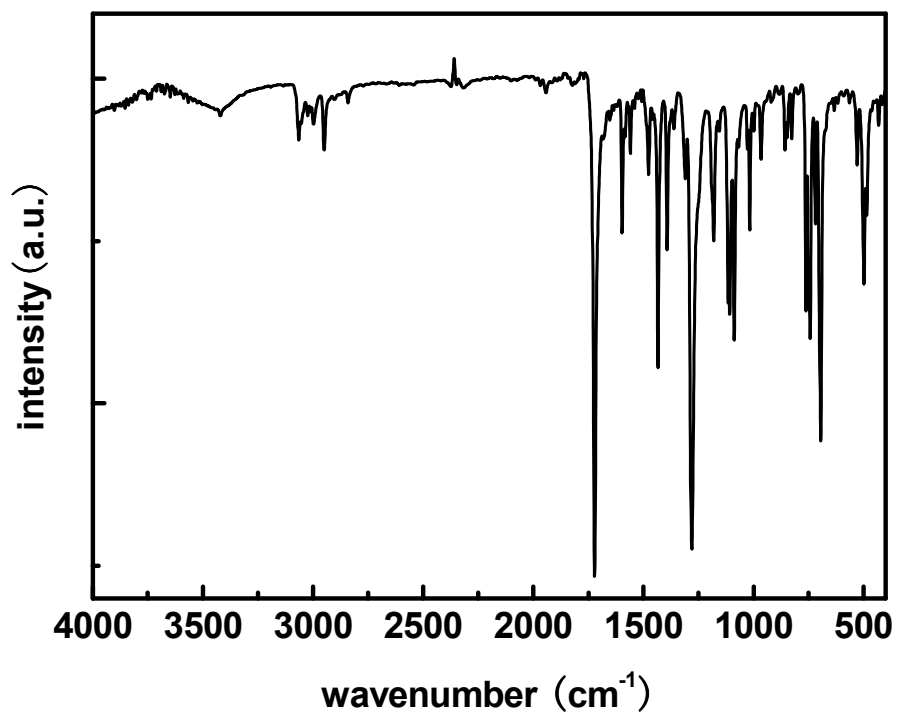

(d)

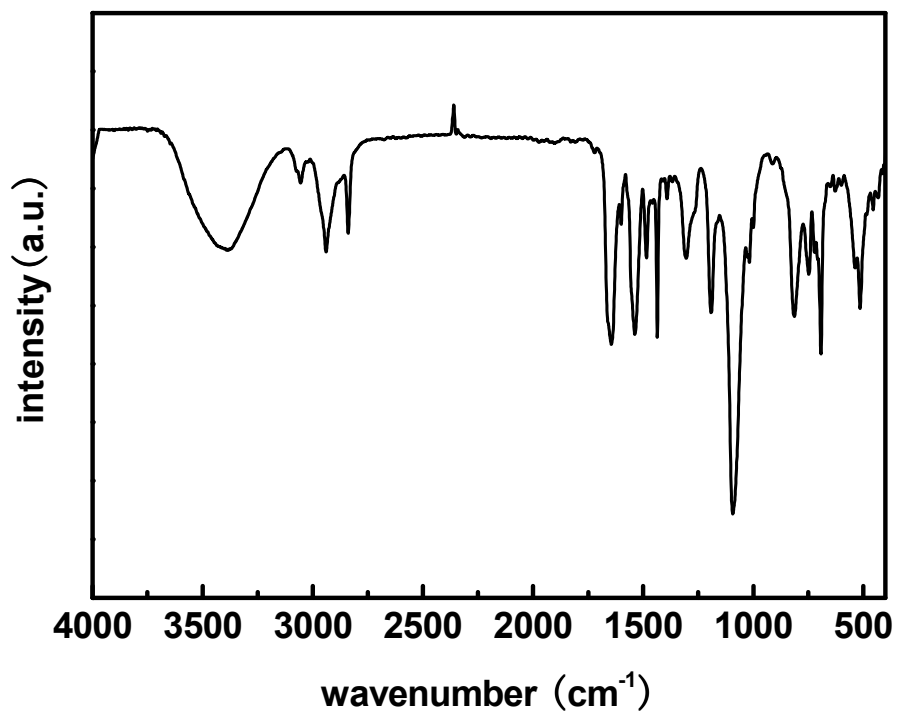

(e)

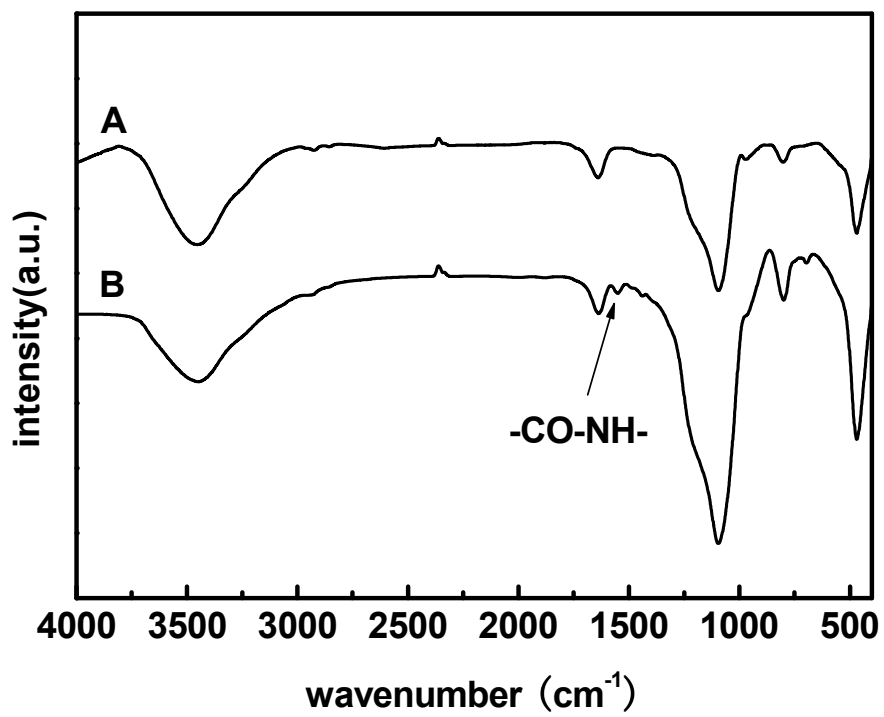

(f)

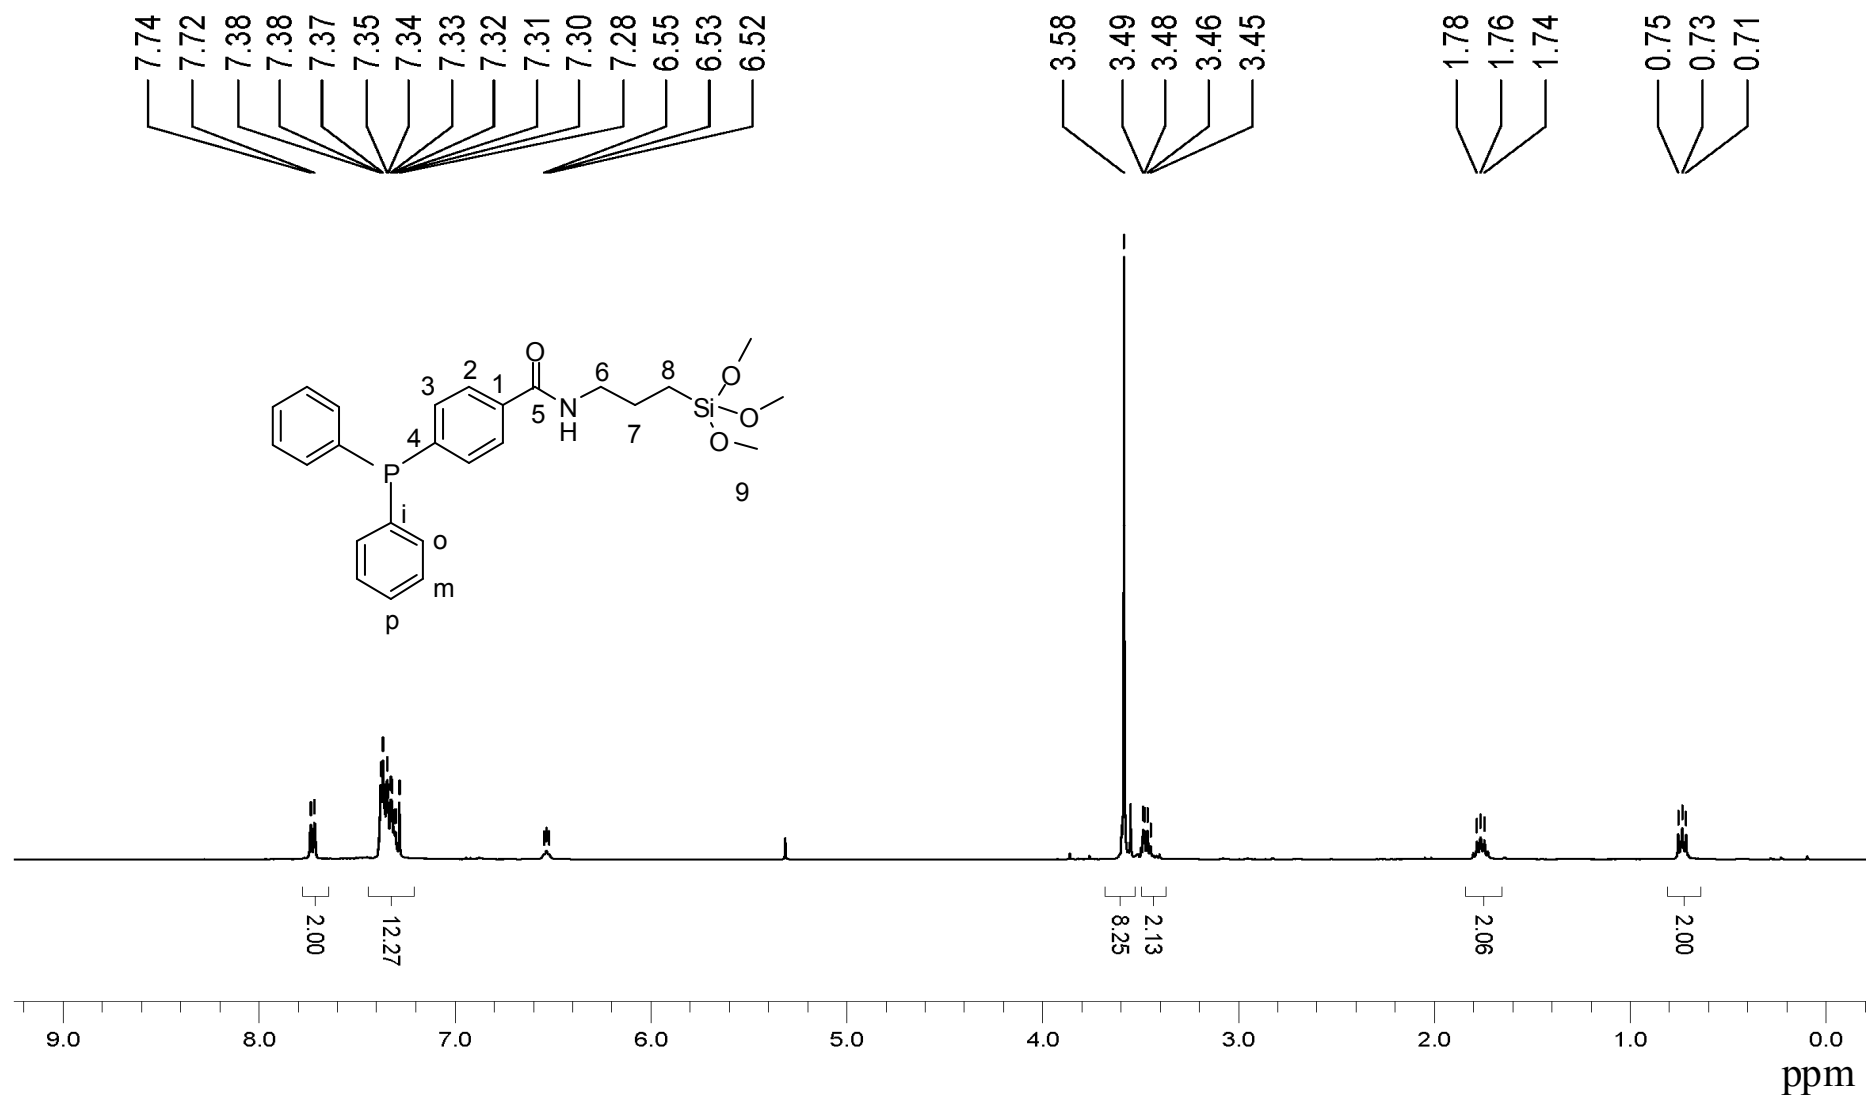

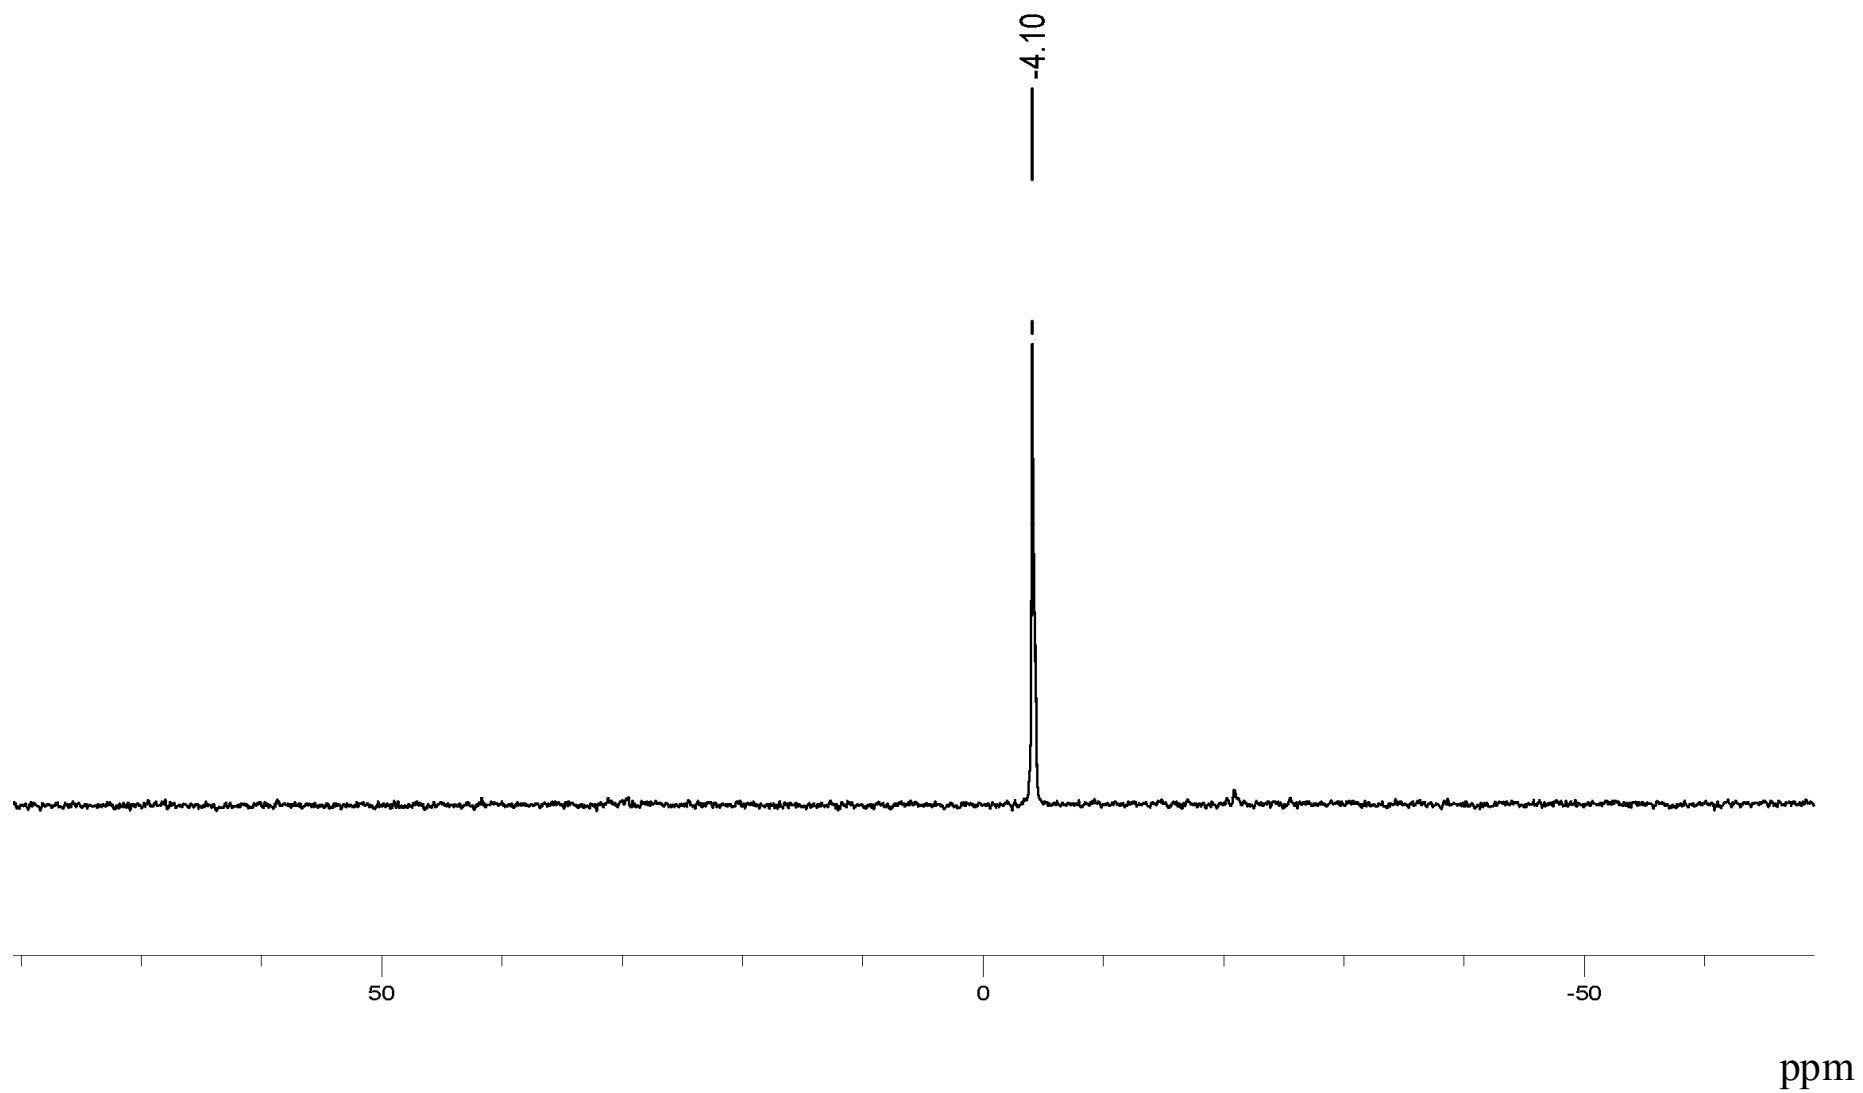

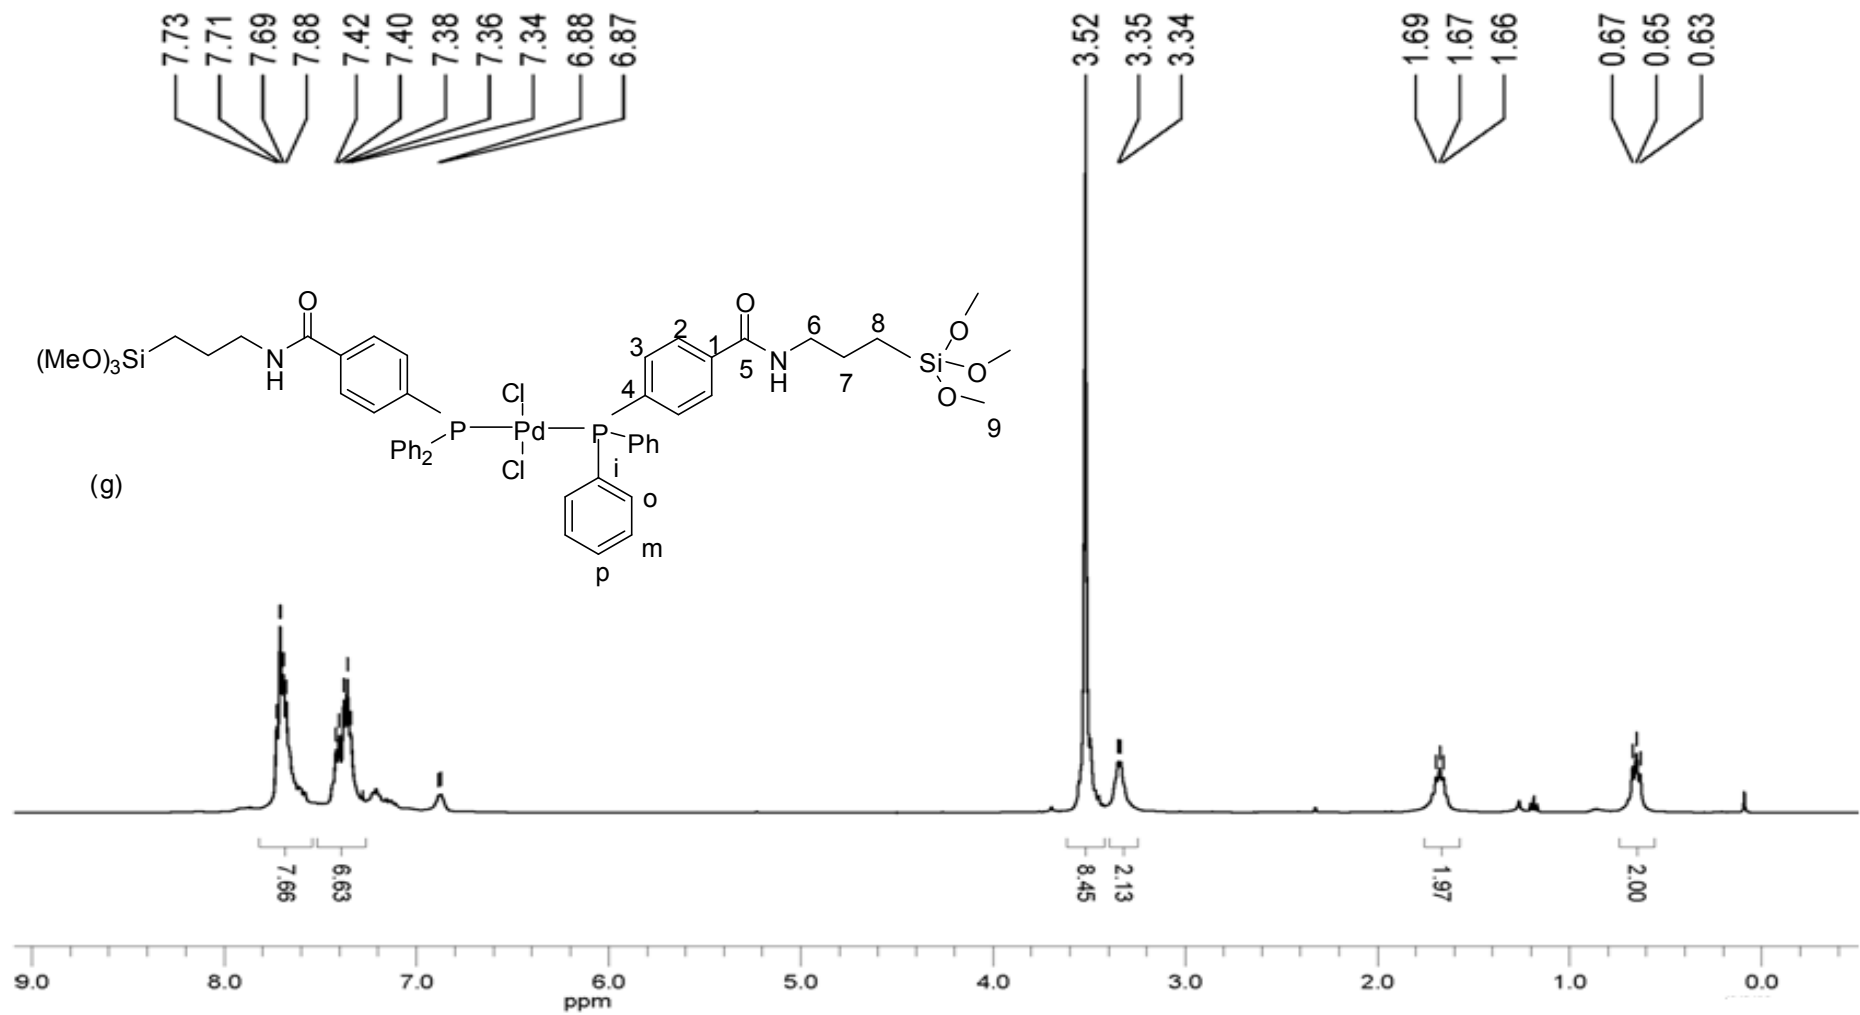

ppm

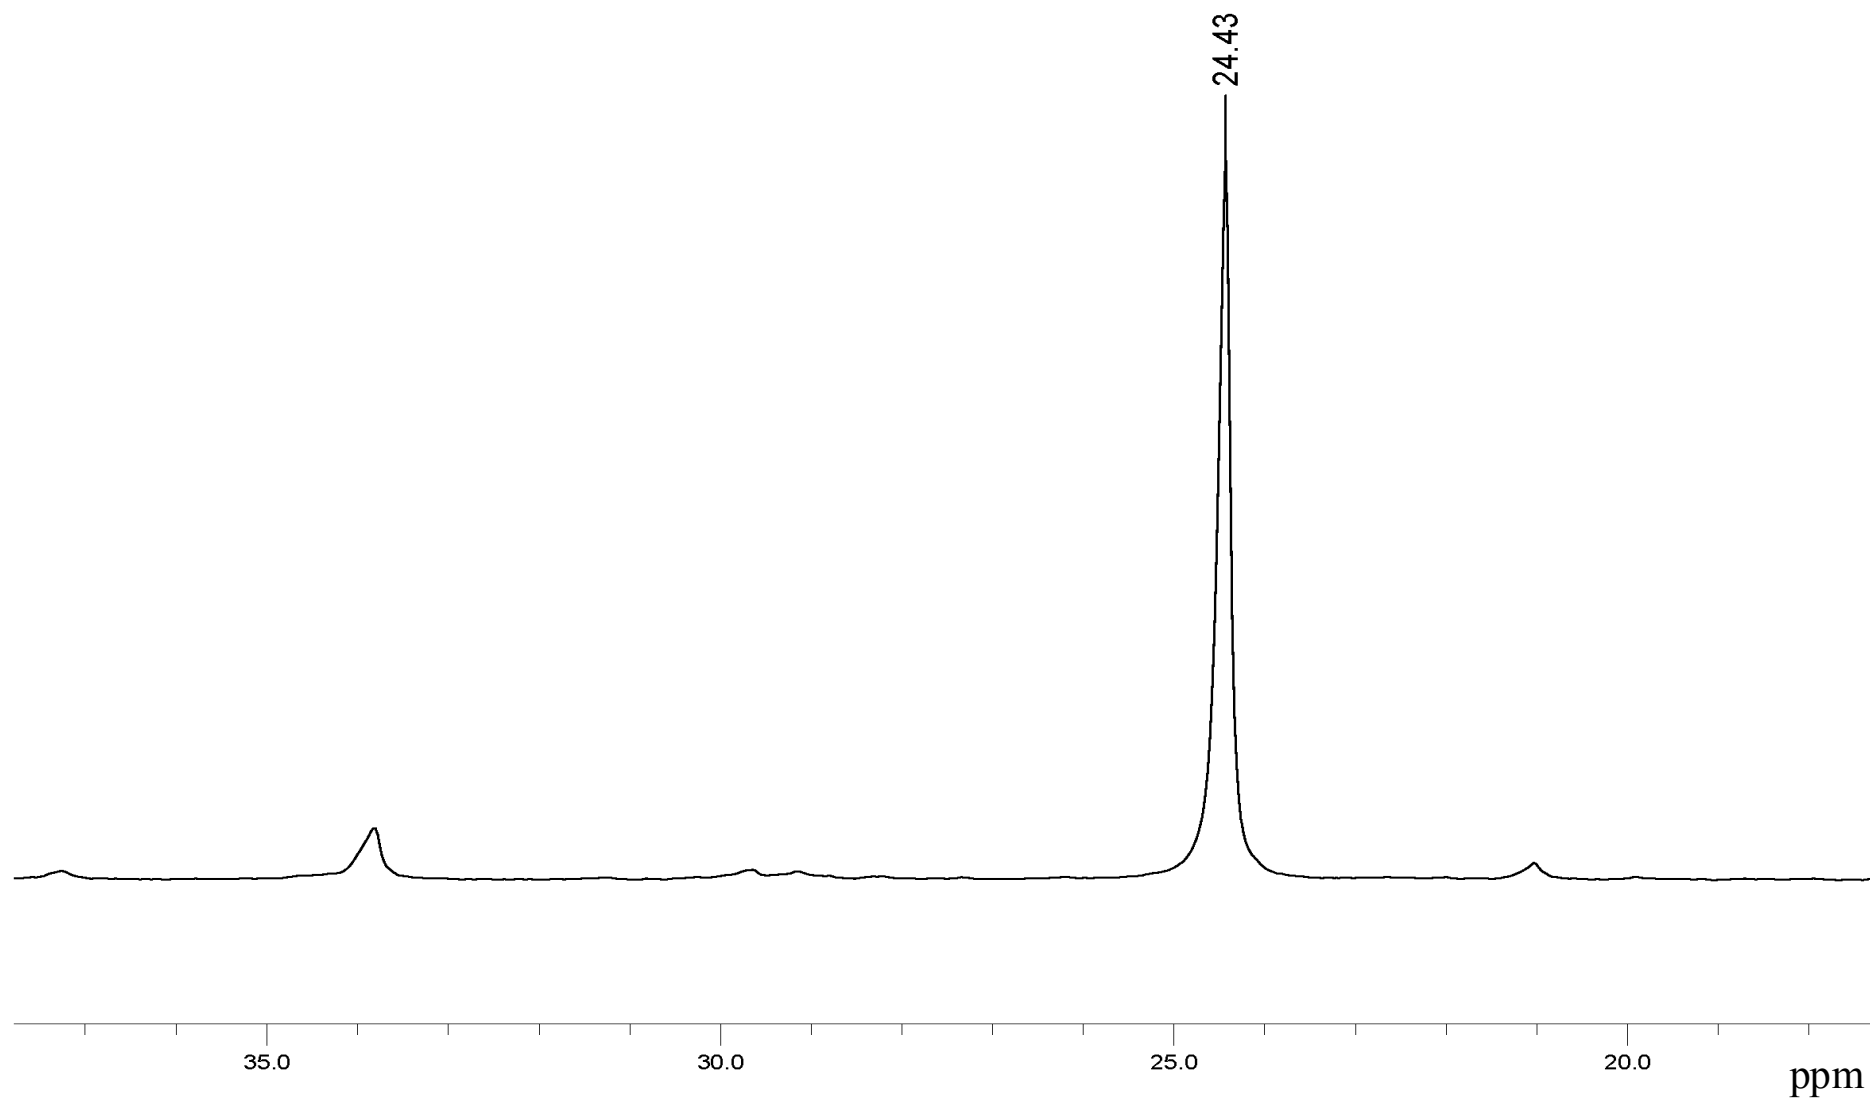

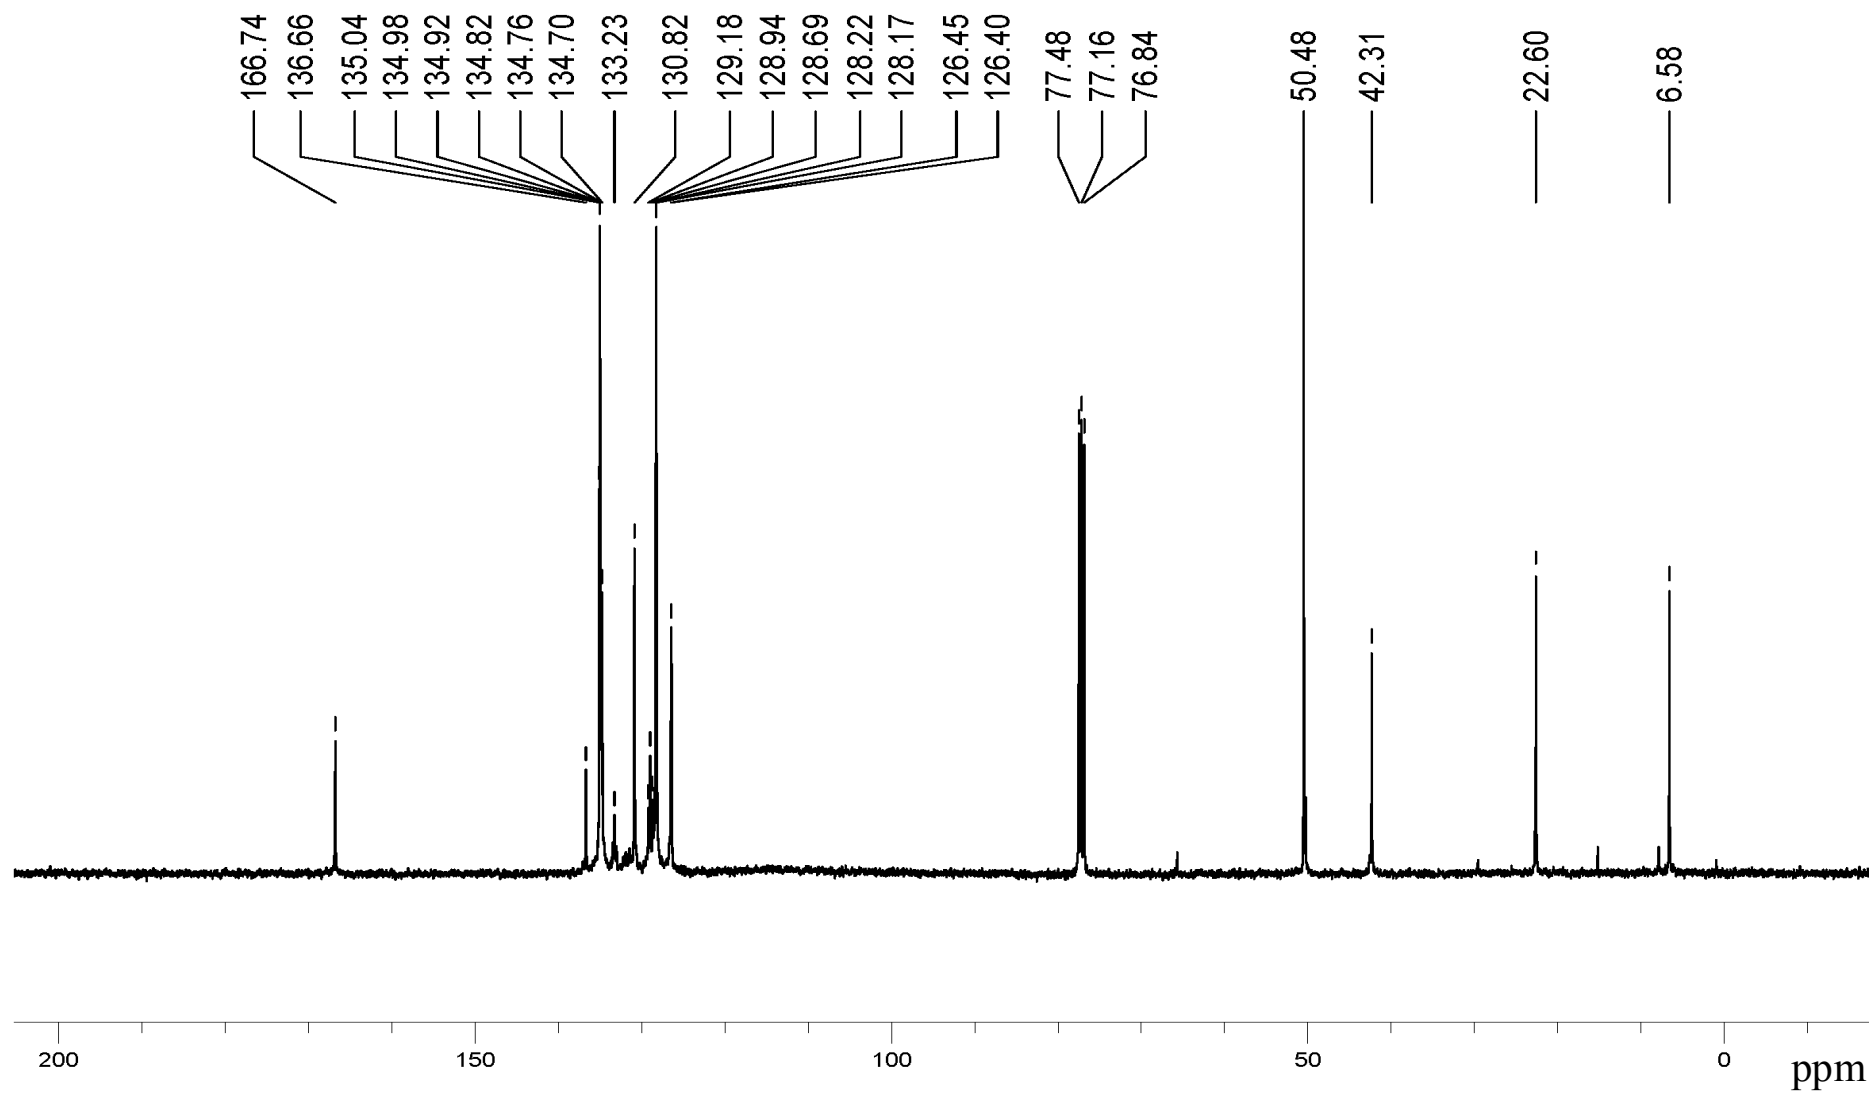

Supplement: b820449g.pdf [file b820449g.pdf]
